# Supplementary material for: A Novel Diagnostic Target in the Hepatitis C Virus Genome
Source: PLOS journal article supplement (doi:10.1371/journal.pmed.1000031), 2009-02-07
Supplement: S1 (10.1371/journal.pmed.1000031.s001) [file journal.pmed.1000031.s001]

**STARD Diagram for  
the evaluation of  
clinical sensitivity\*  
(page 15)**

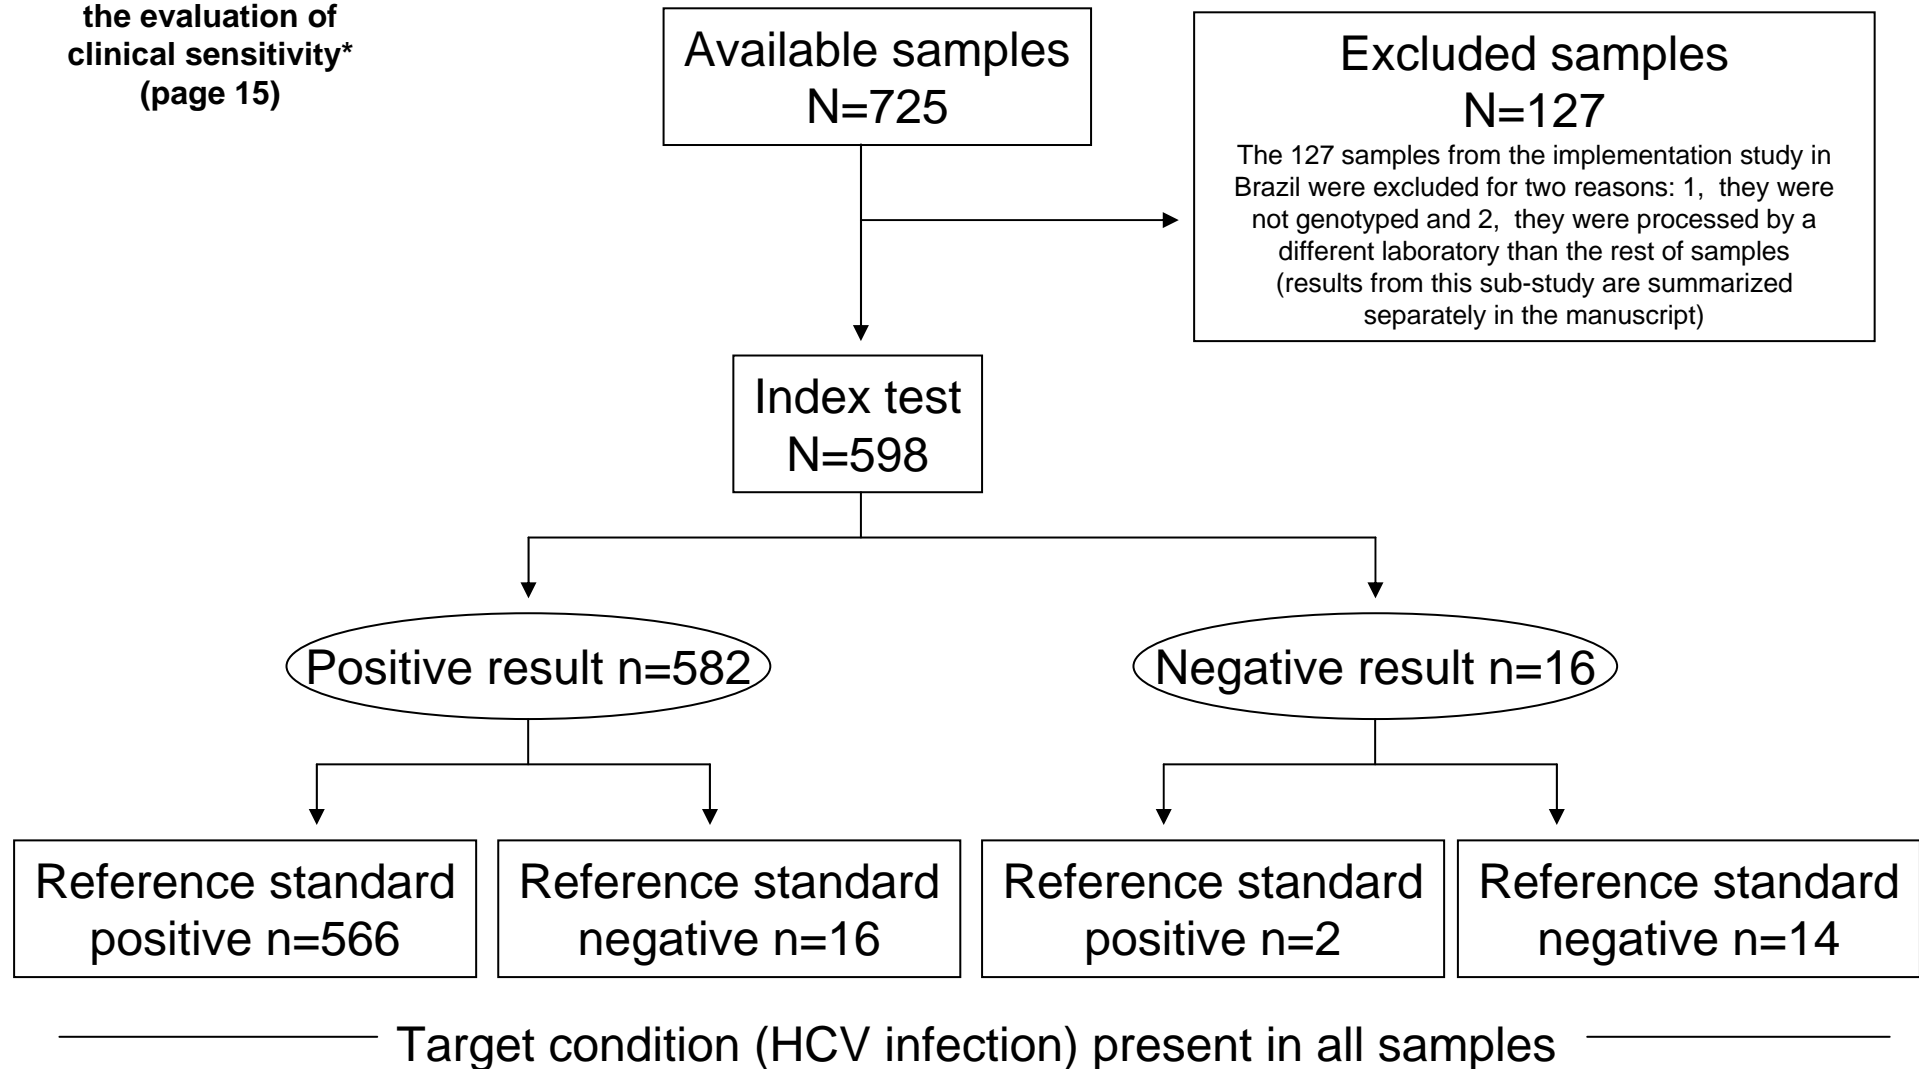

\*In addition to clinical sensitivity we determined analytical sensitivities (limits of detection) for every genotype separately. This allows for a more general comparison of sensitivity with existing assays.
