# Supplementary material for: A Novel Diagnostic Target in the Hepatitis C Virus Genome
Source: PLOS journal article supplement (doi:10.1371/journal.pmed.1000031), 2009-02-07
Supplement: S7 (10.1371/journal.pmed.1000031.s007) [file journal.pmed.1000031.s007]

## HCV X-Tail real time RT-PCR bench protocol

| MasterMix:                  | µL                |
|-----------------------------|-------------------|
| H2O                         | 12.5              |
| 5X Reaction Buffer          | 10.0              |
| dNTP (10mM each)            | 2.0               |
| HCV-specific probe HCVMGB2  | 0.5               |
| Internal Control-probe YFPY | 0.5               |
| Forward primer XTF5         | 1.0               |
| Reverse primer HCMgR2       | 1.5               |
| Enzyme Mix                  | 2.0               |
| <b>TOTAL</b>                | <b>30.0</b>       |
|                             | <b>+ 20.0 RNA</b> |

\* all oligonucleotides are at 10µM concentration

\* dNTP, reaction buffer and enzyme mix from the Qiagen One-Step RT-PCR Kit (or similar)

\* RNA preparation with the Qiagen MinElute Spin Mini (or similar). If using a different extraction strategy, smaller amounts of RNA may be necessary to prevent from reaction inhibition.

\* Follow general PCR precautions like pipetting on ice, calculating 10% pipetting reserve etc.

### Oligonucleotide-Sequences:

|         |                                        |
|---------|----------------------------------------|
| XTF5    | 5'-GTGGCTCCATCTTAGCCCTAGT-3'           |
| HCMgR2  | 5'-TGCGGCTCACGGACCTTT-3'               |
| HCVMGB2 | 5'-FAM-CACGGCTAGCTGTG-MGBBHQ1-3'       |
| YFPY    | 5'-VIC-ATCGTTCGTTGAGCGATTAGCAG-BHQ1-3' |

### Thermal cycling program (ABI 7700 or similar):

| Step                                     | Time                  | Temperature (°C) | Repetition |
|------------------------------------------|-----------------------|------------------|------------|
| Reverse<br>Transcription (RT)            | 10 min                | 55               |            |
| Enzyme activation<br>and RT inactivation | 15 min                | 95               |            |
| PCR                                      | 10 sec                | 94               | X 45       |
|                                          | 20 sec <sup>a,b</sup> | 58               |            |

<sup>a</sup>On ABI 7000, 7300 and 7500 platforms a minimum annealing-extension time of 33 seconds at 58°C may be obligatory

<sup>b</sup>Fluorescence readout at this step

Institute of Virology  
University of Bonn Medical Centre  
Sigmund Freud-Str. 25  
53127 Bonn  
Germany

For transfer of controls/standards:  
Please contact via email: [drexler@virology-bonn.de](mailto:drexler@virology-bonn.de)

**Requirements prior to shipment:**

1. Courier account number with confirmation of assumption of costs by recipient
2. Filled customs declaration forms as required in recipient's country

Shipment contents:

- 1 vial of plasmid template for quantification standard
- 1 vial of plasmid template for internal control

Please contact us separately if *in vitro*-transcribed RNA is requested
